# Supplementary material for: Biomarkers of Exposure among USA Adult Hookah Users: Results from Wave 1 of the Population Assessment of Tobacco and Health (PATH) Study (2013–2014)
Source: PubMed Central journal article supplement (PMC7504577; doi:10.3390/ijerph17176403), 2020-09-02
Supplement: ijerph-17-06403-s001.pdf [file ijerph-17-06403-s001.pdf]

Table S1. Weighted Geometric mean urinary biomarker concentrations (creatinine adjusted) by tobacco use status

| <b>Biomarkers of Exposure</b>                              |          | <b>Never users of tobacco products (n = 1,655)</b> | <b>% Above LOD</b> | <b>Exclusive, established, past 30 day hookah user (n = 98)</b> | <b>% Above LOD</b> |
|------------------------------------------------------------|----------|----------------------------------------------------|--------------------|-----------------------------------------------------------------|--------------------|
| <b>Urinary Nicotine Metabolites</b>                        |          |                                                    |                    |                                                                 |                    |
| Cotinine (COTT) (ug/g)                                     | <i>N</i> | 1644<br>0.42 (0.36, 0.48)                          | 99%                | 98<br>5.45 <sup>^</sup> (2.81, 10.58)                           | 100%               |
| Total Nicotine Equivalents (2) (nmol/g)                    | <i>N</i> | 1633<br>6.29 (5.42, 7.30)                          | -                  | 97<br>86.50 <sup>^</sup> (44.44, 168.37)                        | -                  |
| Cotinine N-oxide (COXT) (ng/g)                             | <i>N</i> | 88<br>13869.70 <sup>^</sup> (6861.91, 28034.27)    | 99%                | 33<br>19394.30 (11679.58, 32204.58)                             | 97%                |
| trans-3 <sup>l</sup> -hydroxycotinine (HCTT) (ng/g)        | <i>N</i> | 1641<br>689.87 (593.67,801.65)                     | 98%                | 97<br>9180.74 <sup>^</sup> (4572.89,18431.67)                   | 99%                |
| Norcotinine (NCTT) (ng/g)                                  | <i>N</i> | 88<br>4269.73 <sup>^</sup> (2272.44,8021.89)       | 95%                | 33<br>5613.07 (3516.60,8959.37)                                 | 97%                |
| Nicotine (NICT) (ng/g)                                     | <i>N</i> | 88<br>31186.49 <sup>^</sup> (12303.26,79052.00)    | 64%                | 33<br>26121.71 <sup>^</sup> (13758.13,49595.66)                 | 66%                |
| Nornicotine (NNCT) <sup>^</sup> (ng/g)                     | <i>N</i> | 88<br>3391 <sup>^</sup> (1846.85,6226.22)          | 35%                | 33<br>3118.67 (2068.60,4701.80)                                 | 55%                |
| Nicotine N-oxide (NOXT) (ng/g)                             | <i>N</i> | 88<br>11489.28 <sup>^</sup> (4238.72,31142.33)     | 76%                | 33<br>6949.05 <sup>^</sup> (3625.81,13318.22)                   | 66%                |
| <b>Minor Tobacco Alkaloids</b>                             |          |                                                    |                    |                                                                 |                    |
| Anabasine (ANBT) <sup>^</sup> (ng/g)                       | <i>N</i> | 88<br>604.72 (347.15, 1053.40)                     | 29%                | 33<br>306.75 (226.76, 414.96)                                   | 32%                |
| Anatabine (ANTT) <sup>^</sup> (ng/g)                       | <i>N</i> | 88<br>615.08 <sup>^</sup> (306.53, 1234.21)        | 37%                | 33<br>265.16 (187.68, 374.63)                                   | 32%                |
| <b>Arsenic and Arsenic Compounds (ug/L)</b>                |          |                                                    |                    |                                                                 |                    |
| Arsenous Acid (UAS3) (ng/g)                                | <i>N</i> | 1653<br>0.33 (0.31,0.36)                           | 73%                | 98<br>0.41 (0.34,0.5)                                           | 91%                |
| Arsenic Acid (UAS5) <sup>^</sup> (ng/g)                    | <i>N</i> | 1653<br>0.53 (0.51,0.57)                           | 3%                 | 98<br>0.43 (0.38,0.48)                                          | 8%                 |
| Dimethylarsinic acid (UDMA) (ng/g)                         | <i>N</i> | 1653<br>3.69 (3.48,3.92)                           | 81%                | 98<br>3.6 (3.09,4.2)                                            | 90%                |
| Monomethylarsonic acid (ng/g)                              | <i>N</i> | 1653<br>0.48 (0.45,0.52)                           | 78%                | 98<br>0.46 (0.38,0.54)                                          | 87%                |
| Total Inorganic Arsenic (ug/g)                             | <i>N</i> | 1653<br>5360.23 (5078.07,5658.04)                  | -                  | 98<br>5221.98 (4532.44,6016.41)                                 | -                  |
| <b>Tobacco Specific Nitrosamines (TSNAs)</b>               |          |                                                    |                    |                                                                 |                    |
| 4-methylnitrosamino)-4-(3-pyridyl)-1-butanol (NNAL) (ng/g) | <i>N</i> | 1653<br>0.92 (0.82,1.04)                           | 51%                | 98<br>2.21 (1.59,3.08)                                          | 83%                |
| N <sup>l</sup> -nitrosoanatabine (NAT) <sup>^</sup> (ng/g) | <i>N</i> | 1648<br>2.92 (2.74,3.11)                           | 1%                 | 98<br>2.61 (2.19,3.11)                                          | 13%                |
| N <sup>l</sup> -nitrosoanabasine (NAB) <sup>^</sup> (ng/g) | <i>N</i> | 1655<br>1.07 (1,1.14)                              | 2%                 | 98<br>0.91 (0.78,1.07)                                          | 11%                |

|                                                          |          |                                 |      |                                 |      |
|----------------------------------------------------------|----------|---------------------------------|------|---------------------------------|------|
| N'-nitrosornicotine (NNN)^<br>(ng/g)                     | <i>N</i> | 1647                            |      | 98                              |      |
|                                                          |          | 1.92 (1.81,2.04)                | 1%   | 1.58 (1.36,1.85)                | 6%   |
| <b>Metals (ng/L)</b>                                     |          |                                 |      |                                 |      |
| Beryllium (UBE) ^ (ng/g)                                 | <i>N</i> | 1653                            |      | 98                              |      |
|                                                          |          | 10.53 (9.94,11.15)              | 3%   | 8.17 (7.22,9.23)                | 6%   |
| Cadmium (UCD) (ng/g)                                     | <i>N</i> | 1652                            |      | 98                              |      |
|                                                          |          | 148.77 (139.59,158.55)          | 93%  | 70.23 (60.29,81.8)              | 82%  |
| Cobalt (UCO) (ng/g)                                      | <i>N</i> | 1653                            |      | 98                              |      |
|                                                          |          | 563.81 (537.49,591.41)          | 100% | 488.91 (431.58,553.85)          | 100% |
| Manganese (UMN) (ng/g)                                   | <i>N</i> | 1652                            |      | 98                              |      |
|                                                          |          | 130.73 (123.58,138.29)          | 47%  | 94.52 (82.36,108.47)            | 45%  |
| Lead (UPB) (ng/g)                                        | <i>N</i> | 1653                            |      | 98                              |      |
|                                                          |          | 351.14 (330.28,373.31)          | 100% | 271.85 (226.73,325.96)          | 100% |
| Strontium (USR) (ug/L)                                   | <i>N</i> | 1653                            |      | 98                              |      |
|                                                          |          | 112.71 (106.77,118.97)          | 100% | 109.14 (95.15,125.17)           | 100% |
| Thallium (UTL) (ng/g)                                    | <i>N</i> | 1652                            |      | 98                              |      |
|                                                          |          | 171.75 (163.62,180.28)          | 100% | 159.95 (143,178.9)              | 100% |
| Uranium (UUR) (ng/g)                                     | <i>N</i> | 1653                            |      | 98                              |      |
|                                                          |          | 5.36 (4.85,5.93)                | 85%  | 4.93 (4.08,5.95)                | 92%  |
| <b>Polycyclic Aromatic Hydrocarbons<br/>(ng/mL)</b>      |          |                                 |      |                                 |      |
| 1-Naphthol or 1-<br>hydroxynaphthalene (1-NAP)<br>(ng/g) | <i>N</i> | 1649                            |      | 98                              |      |
|                                                          |          | 1.4 (1.28,1.53)                 | 99%  | 1.13 (0.92,1.4)                 | 100% |
| 2-Naphthol or 2-<br>hydroxynaphthalene (2-NAP)<br>(ng/g) | <i>N</i> | 1652                            |      | 98                              |      |
|                                                          |          | 4.63 (4.34,4.94)                | 100% | 5.07 (4.25,6.05)                | 100% |
| 3-Hydroxyfluorene (3-FLU)<br>(ng/g)                      | <i>N</i> | 1655                            |      | 98                              |      |
|                                                          |          | 63.98 (60.32,67.86)             | 99%  | 74.22 (60.65,90.82)             | 100% |
| 2-Hydroxyfluorene (2-FLU)<br>(ng/g)                      | <i>N</i> | 1655                            |      | 98                              |      |
|                                                          |          | 167.22 (158.06,176.9)           | 100% | 183.01 (153.91,217.62)          | 100% |
| 1-Hydroxyphenanthrene (1-PHE)<br>(ng/g)                  | <i>N</i> | 1655                            |      | 98                              |      |
|                                                          |          | 106.27 (101.09,111.72)          | 100% | 93.86 (80.95,108.84)            | 100% |
| 1-Hydroxypyrene (1-PYR) (ng/g)                           | <i>N</i> | 1655                            |      | 98                              |      |
|                                                          |          | 128.14 (120.67,136.07)          | 85%  | 148.3 (126.43,173.94)           | 92%  |
| 2- and 3-Hydroxyphenanthrene<br>(2-3PHE) (ng/g)          | <i>N</i> | 1655                            |      | 98                              |      |
|                                                          |          | 128.96 (123.03,135.18)          | 100% | 124.1 (106.77,144.24)           | 100% |
| <b>Volatile Organic Compounds</b>                        |          |                                 |      |                                 |      |
| 2-Methylhippuric acid<br>(2MHA)(ng/g)                    | <i>N</i> | 1589                            |      | 96                              |      |
|                                                          |          | 22251.79<br>(20614.48,24019.14) | 92%  | 17164.55<br>(13641.45,21597.53) | 87%  |
| 3, 4-Methylhippuric acid<br>(34MH)(ng/g)                 | <i>N</i> | 1651                            |      | 98                              |      |
|                                                          |          | 152323<br>(143737.5,161421.3)   | 100% | 130491.1<br>(106198.0,160341.4) | 100% |
| N-Acetyl-S-(2-carbamoylethyl)-<br>Lcysteine (AAMA)(ng/g) | <i>N</i> | 1645                            |      | 95                              |      |
|                                                          |          | 45308.74<br>(43132.9,47594.3)   | 99%  | 59693.49<br>(50328.3,70801.3)   | 100% |

|                                                                      |          |                                 |      |                                 |      |
|----------------------------------------------------------------------|----------|---------------------------------|------|---------------------------------|------|
| N-Acetyl-S-(N-methylcarbamoyl)-L-cysteine (AMCA)(ng/g)               | <i>N</i> | 1653                            |      | 97                              |      |
|                                                                      |          | 104264<br>(98332.0,110553.9)    | 100% | 87601.85<br>(75633.4,101464.2)  | 100% |
| N-Acetyl-S-(benzyl)-L-cysteine (BMA)(ng/g)                           | <i>N</i> | 1653                            |      | 97                              |      |
|                                                                      |          | 6124.5 (5781.5,6487.8)          | 100% | 5509.2 (4661.9,6510.4)          | 100% |
| N-Acetyl-S-(2-carboxyethyl)-L-cysteine (CEMA)(ng/g)                  | <i>N</i> | 1599                            |      | 90                              |      |
|                                                                      |          | 93970.34<br>(89669.2,98477.8)   | 99%  | 93779.5<br>(80648.35,109048.7)  | 100% |
| N-Acetyl-S-(1-cyano-2-hydroxyethyl)-L-cysteine (CYHA)^(ng/g)         | <i>N</i> | 1653                            |      | 98                              |      |
|                                                                      |          | 1817.7 (1710.1,1932.1)          | 3%   | 1882.9 (1498.8,2365.4)          | 16%  |
| N-Acetyl-S-(2-cyanoethyl)-L-cysteine (CYMA)(ng/g)                    | <i>N</i> | 1653                            |      | 98                              |      |
|                                                                      |          | 1271.5(1192.5,1355.7)           | 85%  | 2804.31 (1978.0,3975.8)         | 96%  |
| N-Acetyl-S-(3,4-dihydroxybutyl)-L-cysteine(DHBM)(ng/g)               | <i>N</i> | 1481                            |      | 80                              |      |
|                                                                      |          | 347491.4<br>(335695.0,359702.2) | 89%  | 309586.9<br>(288111.0,332663.6) | 100% |
| N-Acetyl-S-(2-carbamoyl-2-hydroxyethyl)-L-cysteine (GAMA)(ng/g)      | <i>N</i> | 1581                            |      | 95                              |      |
|                                                                      |          | 8580.9 (8097.4,9093.3)          | 38%  | 9113.8 (7833.1,10603.9)         | 61%  |
| N-Acetyl-S-(2-hydroxyethyl)-L-cysteine (HEMA)(ng/g)                  | <i>N</i> | 1508                            |      | 80                              |      |
|                                                                      |          | 961.5 (891.3,1037.3)            | 53%  | 876.12 (712.38,1077.5)          | 72%  |
| N-Acetyl-S-(2-hydroxypropyl)-L-cysteine(HPM2)(ng/g)                  | <i>N</i> | 1605                            |      | 98                              |      |
|                                                                      |          | 32201.7 (29217.3,35490.6)       | 95%  | 31126.08<br>(24362.1,39768.1)   | 99%  |
| N-Acetyl-S-(3-hydroxypropyl)-L-cysteine(HPMA)(ng/g)                  | <i>N</i> | 1653                            |      | 97                              |      |
|                                                                      |          | 262065.0<br>(247449.6,277543.6) | 100% | 257819.9<br>(216169.8,307494.7) | 100% |
| N-Acetyl-S-(3-hydroxypropyl-1-methyl)-L-cysteine (HPMM)(ng/g)        | <i>N</i> | 1653                            |      | 98                              |      |
|                                                                      |          | 440941.7<br>(416424.2,466899.6) | 100% | 377453.6<br>(333472.3,427228.0) | 100% |
| N-Acetyl-S-(4-hydroxy-2-methyl-2-buten-1-yl)-L-cysteine (IPM3)(ng/g) | <i>N</i> | 1637                            |      | 97                              |      |
|                                                                      |          | 3222.5 (3015.5,3443.6)          | 89%  | 2421.7 (2004.9,2925.1)          | 91%  |
| Mandelic acid (MADA)(ng/g)                                           | <i>N</i> | 1464                            |      | 89                              |      |
|                                                                      |          | 127971.2<br>(122327.3,133875.4) | 89%  | 113739.1<br>(102282.7,126478.6) | 99%  |
| N-Acetyl-S-(4-hydroxy-2-buten-1-yl)-L-cysteine (MHB3)(ng/g)          | <i>N</i> | 1653                            |      | 98                              |      |
|                                                                      |          | 4438.3 (4241.1,4644.6)          | 99%  | 3532.6(3047.5,4094.9)           | 100% |
| Phenylglyoxylic acid (PGHA)                                          | <i>N</i> | 1550                            |      | 94                              |      |

|                                                           |   |                                 |     |                                 |      |
|-----------------------------------------------------------|---|---------------------------------|-----|---------------------------------|------|
|                                                           |   | 202278.7<br>(194312.3,210571.8) | 94% | 175571.8<br>(153871.0,200333.2) | 100% |
| N-Acetyl-S-(phenyl)-L-cysteine<br>(PMA)(ng/g)             | N | 1653                            |     | 98                              |      |
|                                                           |   | 1006.7 (935.6,1083.3)           | 68% | 810.5 (656.9,1000.1)            | 72%  |
| 2-Thioxothiazolidine-4-carboxylic<br>acid<br>(TTCA)(ng/g) | N | 1369                            |     | 87                              |      |
|                                                           |   | 20662.5 (18334.9,23285.6)       | 69% | 15518.6 (11085.9,21723.7)       | 66%  |

Weighted estimates; geometric mean calculated by exp (mean of log transformed [biomarker value/creatinine value]). Total Nicotine Equivalents (TNE2) calculated by taking molar sum of trans-3'-hydroxycotinine and cotinine divided by urinary creatinine. ^Estimate should be interpreted with caution because of low reliability. It is based on a sample size of less than 50, or the coefficient of variation is greater than 30%, or the proportion of results below the limit of detection (LOD) is greater than 40%.

Table S2. Linear regression results for biomarkers of exposure by tobacco use status

| Biomarker                                           | Exclusive, established,<br>past 30 day hookah user (n<br>= 98) |                                           |       | Never users of<br>tobacco products<br>(n = 1655) (Ref) |
|-----------------------------------------------------|----------------------------------------------------------------|-------------------------------------------|-------|--------------------------------------------------------|
|                                                     | exp<br>(Coef)                                                  | 95% confidence<br>interval<br>lower upper |       |                                                        |
| <b>Urinary Nicotine Metabolites</b>                 |                                                                |                                           |       |                                                        |
| Urinary cotinine (COTT)                             | 10.57 ^                                                        | 4.94                                      | 22.61 | 1.00                                                   |
| Total Nicotine Equivalents (2)                      | 11.64 ^                                                        | 5.49                                      | 24.68 | 1.00                                                   |
| Cotinine N-oxide (COXT)                             | 1.09 ^                                                         | 0.41                                      | 2.86  | 1.00                                                   |
| trans-3'-hydroxycotinine (HCTT)                     | 11.69 ^                                                        | 5.35                                      | 25.51 | 1.00                                                   |
| Norcotinine (NCTT)                                  | 1.05 ^                                                         | 0.42                                      | 2.64  | 1.00                                                   |
| Nicotine (NICT)                                     | 0.46 ^                                                         | 0.10                                      | 2.03  | 1.00                                                   |
| Nornicotine (NNCT)                                  | 0.71 ^                                                         | 0.27                                      | 1.84  | 1.00                                                   |
| Nicotine N-oxide (NOXT)                             | 0.3 ^                                                          | 0.07                                      | 1.19  | 1.00                                                   |
| <b>Minor Tobacco Alkaloids</b>                      |                                                                |                                           |       |                                                        |
| Anabasine (ANBT)                                    | 0.42 ^                                                         | 0.19                                      | 0.91  | 1.00                                                   |
| Anatabine (ANTT)                                    | 0.3 ^                                                          | 0.11                                      | 0.81  | 1.00                                                   |
| <b>Arsenic and Arsenic Compounds (ug/L)</b>         |                                                                |                                           |       |                                                        |
| Arsenous Acid (UAS3)                                | 1.16                                                           | 0.91                                      | 1.49  | 1.00                                                   |
| Arsenic Acid (UAS5)                                 | 1.02                                                           | 0.98                                      | 1.06  | 1.00                                                   |
| Dimethylarsinic acid (UDMA)                         | 1.17                                                           | 0.99                                      | 1.39  | 1.00                                                   |
| Monomethylarsonic acid                              | 0.99                                                           | 0.80                                      | 1.23  | 1.00                                                   |
| Total Inorganic Arsenic                             | 1.09                                                           | 0.92                                      | 1.28  | 1.00                                                   |
| <b>Tobacco Specific Nitrosamines (TSNAs)</b>        |                                                                |                                           |       |                                                        |
| 4-methylnitrosamino)-4-(3-pyridyl)-1-butanol (NNAL) | 2.29                                                           | 1.52                                      | 3.46  | 1.00                                                   |
| N'-nitrosoanatabine (NAT)                           | 1.11                                                           | 0.95                                      | 1.29  | 1.00                                                   |
| N'-nitrosoanabasine (NAB)                           | 1.09                                                           | 0.98                                      | 1.21  | 1.00                                                   |
| N'-nitrososornicotine (NNN)                         | 1.06                                                           | 0.97                                      | 1.16  | 1.00                                                   |
| <b>Metals (ng/L)</b>                                |                                                                |                                           |       |                                                        |
| Beryllium (UBE)                                     | 1.01                                                           | 0.97                                      | 1.04  | 1.00                                                   |
| Cadmium (UCD)                                       | 0.93                                                           | 0.76                                      | 1.14  | 1.00                                                   |
| Cobalt (UCO)                                        | 0.98                                                           | 0.88                                      | 1.09  | 1.00                                                   |

|                        |      |      |      |      |
|------------------------|------|------|------|------|
| Manganese (UMN)        | 0.97 | 0.89 | 1.07 | 1.00 |
| Lead (UPB)             | 1.19 | 0.99 | 1.43 | 1.00 |
| Strontium (USR) (ug/L) | 1.00 | 0.84 | 1.18 | 1.00 |
| Thallium (UTL)         | 1.08 | 0.96 | 1.21 | 1.00 |
| Uranium (UUR)          | 1.02 | 0.78 | 1.33 | 1.00 |

**Polycyclic Aromatic Hydrocarbons (ng/mL)**

|                                            |      |      |      |      |
|--------------------------------------------|------|------|------|------|
| 1-Naphthol or 1-hydroxynaphthalene (1-NAP) | 1.00 | 0.60 | 1.64 | 1.00 |
| 2-Naphthol or 2-hydroxynaphthalene (2-NAP) | 1.19 | 0.95 | 1.50 | 1.00 |
| 3-Hydroxyfluorene (3-FLU)                  | 1.28 | 1.01 | 1.63 | 1.00 |
| 2-Hydroxyfluorene (2-FLU)                  | 1.22 | 0.99 | 1.49 | 1.00 |
| 1-Hydroxyphenanthrene (1-PHE)              | 1.11 | 0.91 | 1.35 | 1.00 |
| 1-Hydroxypyrene (1-PYR)                    | 1.33 | 1.09 | 1.63 | 1.00 |
| 2- and 3-Hydroxyphenanthrene (2-3PHE)      | 1.15 | 0.95 | 1.38 | 1.00 |

**VOC's**

|                                                                |      |      |      |      |
|----------------------------------------------------------------|------|------|------|------|
| 2-Methylhippuric acid (2MHA)                                   | 0.97 | 0.73 | 1.30 | 1.00 |
| 3,4-Methylhippuric acid (3,4MH)                                | 1.10 | 0.86 | 1.40 | 1.00 |
| N-Acetyl-S-(2-carbamylethyl)-L-cysteine (AAMA)                 | 1.39 | 1.15 | 1.68 | 1.00 |
| N-Acetyl-S-(N-methylcarbamoyl)-L-cysteine (AMCA)               | 1.25 | 1.04 | 1.50 | 1.00 |
| N-Acetyl-S-(benzyl)-L-cysteine (BMA)                           | 1.23 | 1.01 | 1.51 | 1.00 |
| N-Acetyl-S-(2-carboxyethyl)-L-cysteine (CEMA)                  | 1.22 | 1.05 | 1.42 | 1.00 |
| N-Acetyl-S-(1-cyano-2-hydroxyethyl)-L-cysteine (CYHA)          | 1.21 | 0.95 | 1.55 | 1.00 |
| N-Acetyl-S-(2-cyanoethyl)-L-cysteine (CYMA)                    | 1.81 | 1.17 | 2.81 | 1.00 |
| N-Acetyl-S-(3,4-dihydroxybutyl)-L-cysteine (DHBM)              | 1.08 | 0.98 | 1.20 | 1.00 |
| N-Acetyl-S-(2-carbamoyl-2-hydroxyethyl)-L-cysteine (GAMA)      | 1.26 | 1.06 | 1.51 | 1.00 |
| N-Acetyl-S-(2-hydroxyethyl)-L-cysteine (HEMA)                  | 1.05 | 0.84 | 1.30 | 1.00 |
| N-Acetyl-S-(2-hydroxypropyl)-L-cysteine (HPM2)                 | 1.12 | 0.84 | 1.49 | 1.00 |
| N-Acetyl-S-(3-hydroxypropyl)-L-cysteine (HPMA)                 | 1.09 | 0.89 | 1.33 | 1.00 |
| N-Acetyl-S-(3-hydroxypropyl-1-methyl)-L-cysteine (HPMM)        | 1.08 | 0.95 | 1.23 | 1.00 |
| N-Acetyl-S-(4-hydroxy-2-methyl-2-buten-1-yl)-L-cysteine (IPM3) | 0.91 | 0.71 | 1.15 | 1.00 |
| Mandelic acid (MA)                                             | 1.00 | 0.86 | 1.17 | 1.00 |
| N-Acetyl-S-(4-hydroxy-2-buten-1-yl)-L-cysteine (MHB3)          | 0.96 | 0.81 | 1.13 | 1.00 |
| Phenylglyoxylic acid (PGHA)                                    | 1.09 | 0.95 | 1.26 | 1.00 |
| N-Acetyl-S-(phenyl)-L-cysteine (PMA)                           | 1.03 | 0.84 | 1.26 | 1.00 |
| 2-Thioxothiazolidine-4-carboxylic acid (TTCA)                  | 0.92 | 0.62 | 1.35 | 1.00 |

---

Analyses are weighted and models adjusted for transformed creatinine level (g/mL), age, sex, race/ethnicity, education attainment, past 30 day marijuana use and level of SHS exposure. ^Estimate should be interpreted with caution because of low reliability. It is based on a sample size of less than 50, or the coefficient of variation is greater than 30%.
